# Supplementary material for: Protein Network Analysis of the Serum and Their Functional Implication in Patients Subjected to Traumatic Brain Injury
Source: Front Neurosci. 2019 Jan 31;12:1049. doi: 10.3389/fnins.2018.01049 (PMC6365836; doi:10.3389/fnins.2018.01049)
Supplement: Data Sheet S5 — The GO and Pathway analysis of upregulated DEPs. [file Table_5.xlsx]

## Sheet: BP
BP: biological process
#pathway ID	pathway description	observed gene count	false discovery rate	matching proteins in your network (IDs)	matching proteins in your network (labels)
GO.0048518	positive regulation of biological process	26	0.00167	ENSP00000008938,ENSP00000156499,ENSP00000223271,ENSP00000228280,ENSP00000246657,ENSP00000252486,ENSP00000252723,ENSP00000255030,ENSP00000256759,ENSP00000262178,ENSP00000262407,ENSP00000288098,ENSP00000293330,ENSP00000309968,ENSP00000334052,ENSP00000341551,ENSP00000342070,ENSP00000348918,ENSP00000349490,ENSP00000353224,ENSP00000355370,ENSP00000355718,ENSP00000361405,ENSP00000391826,ENSP00000408632…	ADAM17,APOE,CCR7,CDH13,CNTF,CRP,CTSB,DLL1,EPO,FST,HCRT,IGF2,IL34,ITGA2B,KITLG,KLK14,LGMN,MFNG,MMP9,PGLYRP1,RARRES2,SAA1,SMAD4,SMAD5,TFRC,VIPR2
GO.0032501	multicellular organismal process	24	0.0411	ENSP00000156499,ENSP00000220478,ENSP00000223271,ENSP00000228280,ENSP00000246657,ENSP00000252486,ENSP00000256759,ENSP00000263671,ENSP00000265643,ENSP00000274625,ENSP00000309124,ENSP00000309542,ENSP00000309968,ENSP00000323155,ENSP00000330658,ENSP00000334052,ENSP00000342070,ENSP00000348918,ENSP00000349490,ENSP00000353224,ENSP00000355370,ENSP00000355718,ENSP00000376921,ENSP00000408632	ADAM17,APOE,CCR7,CDH13,CHRDL2,CNTF,CTSB,DAND5,DLL1,FGF18,FST,GAL,KITLG,KLK14,LGMN,MFNG,NTNG2,OLR1,PAPPA,PGA5,RARRES2,SAA1,SCG3,TFRC
GO.0060255	regulation of macromolecule metabolic process	23	0.0426	ENSP00000223271,ENSP00000228280,ENSP00000246657,ENSP00000252486,ENSP00000252723,ENSP00000255030,ENSP00000256759,ENSP00000265643,ENSP00000274625,ENSP00000288098,ENSP00000293330,ENSP00000309968,ENSP00000337133,ENSP00000341551,ENSP00000348918,ENSP00000351015,ENSP00000355370,ENSP00000355718,ENSP00000361405,ENSP00000387662,ENSP00000391826,ENSP00000408632,ENSP00000441954	ADAM17,APOE,CCR7,CDH13,CNTF,CRP,DLL1,EPO,FGF18,FST,GAL,GCG,HCRT,IGF2,IL34,KITLG,MMP9,NF1,RARRES2,SAA1,SERPINA9,SMAD4,SMAD5
GO.0007165	signal transduction	22	0.0212	ENSP00000008938,ENSP00000225842,ENSP00000246657,ENSP00000252486,ENSP00000252723,ENSP00000256759,ENSP00000262407,ENSP00000265643,ENSP00000274625,ENSP00000293330,ENSP00000309968,ENSP00000334052,ENSP00000341551,ENSP00000342070,ENSP00000355370,ENSP00000355718,ENSP00000361405,ENSP00000387662,ENSP00000391826,ENSP00000408632,ENSP00000413861,ENSP00000441954	ADAM17,APOE,CCL1,CCR7,CDH13,CNTF,CTSB,DLL1,EPO,FGF18,FST,GAL,GCG,HCRT,IGF2,ITGA2B,LGMN,MMP9,PGLYRP1,SIGLEC9,SMAD4,SMAD5
GO.0031325	positive regulation of cellular metabolic process	21	0.000251	ENSP00000223271,ENSP00000228280,ENSP00000246657,ENSP00000252486,ENSP00000252723,ENSP00000255030,ENSP00000262178,ENSP00000265643,ENSP00000274625,ENSP00000288098,ENSP00000309968,ENSP00000341551,ENSP00000348918,ENSP00000351015,ENSP00000355370,ENSP00000355718,ENSP00000361405,ENSP00000387662,ENSP00000391826,ENSP00000408632,ENSP00000441954	ADAM17,APOE,CCR7,CDH13,CNTF,CRP,DLL1,EPO,FGF18,GAL,GCG,IGF2,IL34,KITLG,MMP9,NF1,RARRES2,SAA1,SMAD4,SMAD5,VIPR2
GO.0048523	negative regulation of cellular process	21	0.00915	ENSP00000008938,ENSP00000156499,ENSP00000228280,ENSP00000246657,ENSP00000252486,ENSP00000252723,ENSP00000255030,ENSP00000256759,ENSP00000262178,ENSP00000263671,ENSP00000293330,ENSP00000301411,ENSP00000309968,ENSP00000323155,ENSP00000334052,ENSP00000337133,ENSP00000341551,ENSP00000342070,ENSP00000355370,ENSP00000361405,ENSP00000408632	ADAM17,APOE,CCR7,CDH13,CHRDL2,CNTF,CRP,CTSB,DAND5,EPO,FST,HCRT,KITLG,KLK14,LGMN,MMP9,NTF4,PGLYRP1,SERPINA9,SMAD4,VIPR2
GO.0048519	negative regulation of biological process	21	0.0197	ENSP00000008938,ENSP00000156499,ENSP00000228280,ENSP00000246657,ENSP00000252486,ENSP00000252723,ENSP00000255030,ENSP00000256759,ENSP00000262178,ENSP00000263671,ENSP00000293330,ENSP00000301411,ENSP00000309968,ENSP00000323155,ENSP00000337133,ENSP00000341551,ENSP00000342070,ENSP00000348918,ENSP00000355370,ENSP00000361405,ENSP00000408632	ADAM17,APOE,CCR7,CDH13,CHRDL2,CNTF,CRP,CTSB,DAND5,EPO,FST,HCRT,KITLG,KLK14,MMP9,NTF4,PGLYRP1,SAA1,SERPINA9,SMAD4,VIPR2
GO.0048522	positive regulation of cellular process	21	0.0245	ENSP00000156499,ENSP00000223271,ENSP00000228280,ENSP00000246657,ENSP00000252486,ENSP00000252723,ENSP00000255030,ENSP00000262178,ENSP00000262407,ENSP00000288098,ENSP00000293330,ENSP00000309968,ENSP00000341551,ENSP00000348918,ENSP00000349490,ENSP00000355370,ENSP00000355718,ENSP00000361405,ENSP00000391826,ENSP00000408632,ENSP00000441954	ADAM17,APOE,CCR7,CDH13,CNTF,CRP,DLL1,EPO,HCRT,IGF2,IL34,ITGA2B,KITLG,KLK14,MFNG,MMP9,RARRES2,SAA1,SMAD4,SMAD5,VIPR2
GO.0023051	regulation of signaling	20	0.000459	ENSP00000156499,ENSP00000228280,ENSP00000246657,ENSP00000252486,ENSP00000252723,ENSP00000256759,ENSP00000263671,ENSP00000265643,ENSP00000293330,ENSP00000309968,ENSP00000323155,ENSP00000334052,ENSP00000341551,ENSP00000348918,ENSP00000349490,ENSP00000355370,ENSP00000355718,ENSP00000361405,ENSP00000391826,ENSP00000408632	ADAM17,APOE,CCR7,CDH13,CHRDL2,CNTF,DAND5,DLL1,EPO,FST,GAL,HCRT,IGF2,KITLG,KLK14,LGMN,MFNG,MMP9,SAA1,SMAD4
GO.0010646	regulation of cell communication	20	0.000807	ENSP00000156499,ENSP00000228280,ENSP00000246657,ENSP00000252486,ENSP00000252723,ENSP00000256759,ENSP00000263671,ENSP00000265643,ENSP00000293330,ENSP00000309968,ENSP00000323155,ENSP00000334052,ENSP00000341551,ENSP00000348918,ENSP00000349490,ENSP00000355370,ENSP00000355718,ENSP00000361405,ENSP00000391826,ENSP00000408632	ADAM17,APOE,CCR7,CDH13,CHRDL2,CNTF,DAND5,DLL1,EPO,FST,GAL,HCRT,IGF2,KITLG,KLK14,LGMN,MFNG,MMP9,SAA1,SMAD4
GO.0006950	response to stress	20	0.00589	ENSP00000008938,ENSP00000220478,ENSP00000223271,ENSP00000228280,ENSP00000246657,ENSP00000252486,ENSP00000252723,ENSP00000255030,ENSP00000265643,ENSP00000274625,ENSP00000277480,ENSP00000288098,ENSP00000309124,ENSP00000309968,ENSP00000334052,ENSP00000341551,ENSP00000348918,ENSP00000353224,ENSP00000387662,ENSP00000391826	ADAM17,APOE,CCR7,CRP,EPO,FGF18,GAL,GCG,IGF2,IL34,KITLG,LCN2,LGMN,OLR1,PGLYRP1,RARRES2,SAA1,SCG3,SMAD4,TFRC
GO.0048731	system development	20	0.0082	ENSP00000223271,ENSP00000228280,ENSP00000246657,ENSP00000252486,ENSP00000252723,ENSP00000256759,ENSP00000262407,ENSP00000263671,ENSP00000265643,ENSP00000274625,ENSP00000309968,ENSP00000323155,ENSP00000341551,ENSP00000342070,ENSP00000353224,ENSP00000355370,ENSP00000355718,ENSP00000376921,ENSP00000408632,ENSP00000441954	ADAM17,APOE,CCR7,CDH13,CHRDL2,CNTF,CTSB,DAND5,DLL1,EPO,FGF18,FST,GAL,ITGA2B,KITLG,NTNG2,RARRES2,SMAD4,SMAD5,TFRC
GO.0007275	multicellular organismal development	20	0.0308	ENSP00000223271,ENSP00000228280,ENSP00000246657,ENSP00000252486,ENSP00000252723,ENSP00000256759,ENSP00000262407,ENSP00000263671,ENSP00000265643,ENSP00000274625,ENSP00000309968,ENSP00000323155,ENSP00000341551,ENSP00000342070,ENSP00000349490,ENSP00000353224,ENSP00000355370,ENSP00000355718,ENSP00000376921,ENSP00000408632	ADAM17,APOE,CCR7,CDH13,CHRDL2,CNTF,CTSB,DAND5,DLL1,EPO,FGF18,FST,GAL,ITGA2B,KITLG,MFNG,NTNG2,RARRES2,SMAD4,TFRC
GO.0002376	immune system process	19	8.53e-05	ENSP00000008938,ENSP00000225842,ENSP00000228280,ENSP00000246657,ENSP00000252723,ENSP00000255030,ENSP00000256759,ENSP00000274625,ENSP00000277480,ENSP00000288098,ENSP00000309124,ENSP00000309968,ENSP00000334052,ENSP00000342070,ENSP00000348918,ENSP00000353224,ENSP00000355718,ENSP00000366234,ENSP00000441954	ADAM17,CCL1,CCR7,CRP,CTSB,DLL1,EPO,FGF18,FST,IL31,IL34,KITLG,LCN2,LGMN,OLR1,PGLYRP1,SAA1,SMAD5,TFRC
GO.0051239	regulation of multicellular organismal process	19	0.000316	ENSP00000004982,ENSP00000008938,ENSP00000228280,ENSP00000246657,ENSP00000252486,ENSP00000252723,ENSP00000255030,ENSP00000256759,ENSP00000265643,ENSP00000288098,ENSP00000293330,ENSP00000309968,ENSP00000334052,ENSP00000341551,ENSP00000348918,ENSP00000353224,ENSP00000355370,ENSP00000361405,ENSP00000441954	ADAM17,APOE,CCR7,CNTF,CRP,EPO,FST,GAL,HCRT,HSPB6,IL34,KITLG,LGMN,MMP9,PGLYRP1,SAA1,SMAD4,SMAD5,TFRC
GO.0009966	regulation of signal transduction	19	0.000373	ENSP00000156499,ENSP00000228280,ENSP00000246657,ENSP00000252486,ENSP00000252723,ENSP00000256759,ENSP00000263671,ENSP00000309968,ENSP00000323155,ENSP00000334052,ENSP00000341551,ENSP00000348918,ENSP00000349490,ENSP00000355370,ENSP00000355718,ENSP00000361405,ENSP00000387662,ENSP00000391826,ENSP00000408632	ADAM17,APOE,CCR7,CDH13,CHRDL2,CNTF,DAND5,DLL1,EPO,FST,GCG,IGF2,KITLG,KLK14,LGMN,MFNG,MMP9,SAA1,SMAD4
GO.0010604	positive regulation of macromolecule metabolic process	19	0.00095	ENSP00000223271,ENSP00000228280,ENSP00000246657,ENSP00000252486,ENSP00000252723,ENSP00000255030,ENSP00000265643,ENSP00000274625,ENSP00000288098,ENSP00000309968,ENSP00000341551,ENSP00000348918,ENSP00000355370,ENSP00000355718,ENSP00000361405,ENSP00000387662,ENSP00000391826,ENSP00000408632,ENSP00000441954	ADAM17,APOE,CCR7,CDH13,CNTF,CRP,DLL1,EPO,FGF18,GAL,GCG,IGF2,IL34,KITLG,MMP9,RARRES2,SAA1,SMAD4,SMAD5
GO.0048583	regulation of response to stimulus	19	0.0102	ENSP00000156499,ENSP00000223271,ENSP00000246657,ENSP00000252486,ENSP00000252723,ENSP00000256759,ENSP00000263671,ENSP00000309968,ENSP00000323155,ENSP00000334052,ENSP00000341551,ENSP00000342070,ENSP00000348918,ENSP00000349490,ENSP00000355370,ENSP00000355718,ENSP00000361405,ENSP00000391826,ENSP00000408632	ADAM17,APOE,CCR7,CDH13,CHRDL2,CNTF,CTSB,DAND5,DLL1,EPO,FST,IGF2,KLK14,LGMN,MFNG,MMP9,RARRES2,SAA1,SMAD4
GO.0048584	positive regulation of response to stimulus	18	0.000133	ENSP00000008938,ENSP00000156499,ENSP00000223271,ENSP00000228280,ENSP00000246657,ENSP00000252723,ENSP00000309968,ENSP00000334052,ENSP00000341551,ENSP00000342070,ENSP00000348918,ENSP00000349490,ENSP00000351015,ENSP00000355370,ENSP00000355718,ENSP00000361405,ENSP00000391826,ENSP00000408632	ADAM17,CCR7,CDH13,CNTF,CTSB,DLL1,EPO,IGF2,KITLG,KLK14,LGMN,MFNG,MMP9,NF1,PGLYRP1,RARRES2,SAA1,SMAD4
GO.0030154	cell differentiation	18	0.0134	ENSP00000223271,ENSP00000228280,ENSP00000246657,ENSP00000252486,ENSP00000252723,ENSP00000256759,ENSP00000262407,ENSP00000263671,ENSP00000274625,ENSP00000309968,ENSP00000330658,ENSP00000342070,ENSP00000353224,ENSP00000355370,ENSP00000361405,ENSP00000376921,ENSP00000391826,ENSP00000441954	ADAM17,APOE,CCR7,CHRDL2,CNTF,CTSB,EPO,FGF18,FST,IGF2,ITGA2B,KITLG,MMP9,NTNG2,PAPPA,RARRES2,SMAD5,TFRC
GO.0048513	organ development	17	0.00873	ENSP00000223271,ENSP00000228280,ENSP00000246657,ENSP00000252723,ENSP00000256759,ENSP00000263671,ENSP00000274625,ENSP00000309968,ENSP00000323155,ENSP00000341551,ENSP00000342070,ENSP00000353224,ENSP00000355370,ENSP00000355718,ENSP00000361405,ENSP00000391826,ENSP00000441954	ADAM17,CCR7,CHRDL2,CNTF,CTSB,DAND5,DLL1,EPO,FGF18,FST,IGF2,KITLG,MMP9,RARRES2,SMAD4,SMAD5,TFRC
GO.0065009	regulation of molecular function	17	0.00915	ENSP00000228280,ENSP00000246657,ENSP00000252486,ENSP00000252723,ENSP00000262178,ENSP00000265643,ENSP00000274625,ENSP00000309968,ENSP00000337133,ENSP00000341551,ENSP00000342070,ENSP00000348918,ENSP00000349490,ENSP00000351015,ENSP00000361405,ENSP00000387662,ENSP00000391826	ADAM17,APOE,CCR7,CTSB,EPO,FGF18,GAL,GCG,IGF2,KITLG,MFNG,MMP9,NF1,SAA1,SERPINA9,SMAD4,VIPR2
GO.0045937	positive regulation of phosphate metabolic process	16	1.65e-06	ENSP00000223271,ENSP00000228280,ENSP00000246657,ENSP00000252486,ENSP00000252723,ENSP00000262178,ENSP00000274625,ENSP00000288098,ENSP00000309968,ENSP00000341551,ENSP00000348918,ENSP00000351015,ENSP00000355370,ENSP00000361405,ENSP00000387662,ENSP00000391826	ADAM17,APOE,CCR7,CNTF,EPO,FGF18,GCG,IGF2,IL34,KITLG,MMP9,NF1,RARRES2,SAA1,SMAD4,VIPR2
GO.0023056	positive regulation of signaling	16	0.000133	ENSP00000156499,ENSP00000228280,ENSP00000246657,ENSP00000252723,ENSP00000265643,ENSP00000293330,ENSP00000309968,ENSP00000341551,ENSP00000348918,ENSP00000349490,ENSP00000351015,ENSP00000355370,ENSP00000355718,ENSP00000361405,ENSP00000391826,ENSP00000408632	ADAM17,CCR7,CDH13,CNTF,DLL1,EPO,GAL,HCRT,IGF2,KITLG,KLK14,MFNG,MMP9,NF1,SAA1,SMAD4
GO.0010647	positive regulation of cell communication	16	0.000238	ENSP00000156499,ENSP00000228280,ENSP00000246657,ENSP00000252723,ENSP00000265643,ENSP00000293330,ENSP00000309968,ENSP00000341551,ENSP00000348918,ENSP00000349490,ENSP00000351015,ENSP00000355370,ENSP00000355718,ENSP00000361405,ENSP00000391826,ENSP00000408632	ADAM17,CCR7,CDH13,CNTF,DLL1,EPO,GAL,HCRT,IGF2,KITLG,KLK14,MFNG,MMP9,NF1,SAA1,SMAD4
GO.0032268	regulation of cellular protein metabolic process	16	0.00593	ENSP00000223271,ENSP00000228280,ENSP00000246657,ENSP00000252486,ENSP00000252723,ENSP00000274625,ENSP00000288098,ENSP00000309968,ENSP00000337133,ENSP00000341551,ENSP00000348918,ENSP00000351015,ENSP00000355370,ENSP00000361405,ENSP00000387662,ENSP00000391826	ADAM17,APOE,CCR7,CNTF,EPO,FGF18,GCG,IGF2,IL34,KITLG,MMP9,NF1,RARRES2,SAA1,SERPINA9,SMAD4
GO.0070887	cellular response to chemical stimulus	16	0.00626	ENSP00000225842,ENSP00000228280,ENSP00000246657,ENSP00000252723,ENSP00000274625,ENSP00000309968,ENSP00000341551,ENSP00000342070,ENSP00000348918,ENSP00000353224,ENSP00000355370,ENSP00000366641,ENSP00000387662,ENSP00000391826,ENSP00000408632,ENSP00000441954	ADAM17,CCL1,CCR7,CDH13,CNTF,CTSB,EPO,FGF18,GCG,IGF2,KITLG,SAA1,SLC2A5,SMAD4,SMAD5,TFRC
GO.0001932	regulation of protein phosphorylation	15	8.53e-05	ENSP00000223271,ENSP00000228280,ENSP00000246657,ENSP00000252486,ENSP00000252723,ENSP00000274625,ENSP00000288098,ENSP00000309968,ENSP00000341551,ENSP00000348918,ENSP00000351015,ENSP00000355370,ENSP00000361405,ENSP00000387662,ENSP00000391826	ADAM17,APOE,CCR7,CNTF,EPO,FGF18,GCG,IGF2,IL34,KITLG,MMP9,NF1,RARRES2,SAA1,SMAD4
GO.0009967	positive regulation of signal transduction	15	0.000156	ENSP00000156499,ENSP00000228280,ENSP00000246657,ENSP00000252723,ENSP00000309968,ENSP00000341551,ENSP00000348918,ENSP00000349490,ENSP00000351015,ENSP00000355370,ENSP00000355718,ENSP00000361405,ENSP00000387662,ENSP00000391826,ENSP00000408632	ADAM17,CCR7,CDH13,CNTF,DLL1,EPO,GCG,IGF2,KITLG,KLK14,MFNG,MMP9,NF1,SAA1,SMAD4
GO.0006952	defense response	15	0.000298	ENSP00000008938,ENSP00000223271,ENSP00000228280,ENSP00000246657,ENSP00000255030,ENSP00000265643,ENSP00000274625,ENSP00000277480,ENSP00000288098,ENSP00000309124,ENSP00000309968,ENSP00000334052,ENSP00000342070,ENSP00000348918,ENSP00000353224	ADAM17,CCR7,CRP,CTSB,FGF18,GAL,IL34,KITLG,LCN2,LGMN,OLR1,PGLYRP1,RARRES2,SAA1,TFRC
GO.0032879	regulation of localization	15	0.0154	ENSP00000223271,ENSP00000228280,ENSP00000246657,ENSP00000252486,ENSP00000252723,ENSP00000255030,ENSP00000262407,ENSP00000265643,ENSP00000274625,ENSP00000293330,ENSP00000309968,ENSP00000341551,ENSP00000348918,ENSP00000361405,ENSP00000408632	ADAM17,APOE,CCR7,CDH13,CRP,EPO,FGF18,GAL,HCRT,ITGA2B,KITLG,MMP9,RARRES2,SAA1,SMAD4
GO.0010033	response to organic substance	15	0.0274	ENSP00000225842,ENSP00000228280,ENSP00000246657,ENSP00000252723,ENSP00000265643,ENSP00000274625,ENSP00000309968,ENSP00000341551,ENSP00000353224,ENSP00000355370,ENSP00000366641,ENSP00000387662,ENSP00000391826,ENSP00000408632,ENSP00000441954	ADAM17,CCL1,CCR7,CDH13,CNTF,EPO,FGF18,GAL,GCG,IGF2,KITLG,SLC2A5,SMAD4,SMAD5,TFRC
GO.0032270	positive regulation of cellular protein metabolic process	14	0.000546	ENSP00000223271,ENSP00000228280,ENSP00000246657,ENSP00000252486,ENSP00000252723,ENSP00000274625,ENSP00000288098,ENSP00000309968,ENSP00000341551,ENSP00000348918,ENSP00000355370,ENSP00000361405,ENSP00000387662,ENSP00000391826	ADAM17,APOE,CCR7,CNTF,EPO,FGF18,GCG,IGF2,IL34,KITLG,MMP9,RARRES2,SAA1,SMAD4
GO.0051240	positive regulation of multicellular organismal process	14	0.000758	ENSP00000228280,ENSP00000246657,ENSP00000252486,ENSP00000252723,ENSP00000256759,ENSP00000265643,ENSP00000288098,ENSP00000293330,ENSP00000309968,ENSP00000341551,ENSP00000348918,ENSP00000353224,ENSP00000361405,ENSP00000441954	ADAM17,APOE,CCR7,EPO,FST,GAL,HCRT,IL34,KITLG,MMP9,SAA1,SMAD4,SMAD5,TFRC
GO.0044093	positive regulation of molecular function	14	0.00428	ENSP00000228280,ENSP00000246657,ENSP00000252486,ENSP00000252723,ENSP00000262178,ENSP00000265643,ENSP00000274625,ENSP00000309968,ENSP00000348918,ENSP00000349490,ENSP00000351015,ENSP00000361405,ENSP00000387662,ENSP00000391826	ADAM17,APOE,CCR7,EPO,FGF18,GAL,GCG,IGF2,KITLG,MFNG,MMP9,NF1,SAA1,VIPR2
GO.0050793	regulation of developmental process	14	0.0201	ENSP00000008938,ENSP00000223271,ENSP00000228280,ENSP00000252486,ENSP00000252723,ENSP00000255030,ENSP00000256759,ENSP00000265643,ENSP00000274625,ENSP00000288098,ENSP00000334052,ENSP00000341551,ENSP00000355370,ENSP00000441954	APOE,CNTF,CRP,EPO,FGF18,FST,GAL,IL34,KITLG,LGMN,PGLYRP1,RARRES2,SMAD4,SMAD5
GO.0009653	anatomical structure morphogenesis	14	0.0203	ENSP00000156499,ENSP00000252486,ENSP00000262407,ENSP00000301411,ENSP00000309968,ENSP00000341551,ENSP00000351015,ENSP00000355370,ENSP00000355718,ENSP00000361405,ENSP00000376921,ENSP00000391826,ENSP00000408632,ENSP00000441954	ADAM17,APOE,CDH13,CNTF,DLL1,IGF2,ITGA2B,KLK14,MMP9,NF1,NTF4,NTNG2,SMAD4,SMAD5
GO.0050790	regulation of catalytic activity	14	0.0299	ENSP00000228280,ENSP00000246657,ENSP00000252486,ENSP00000252723,ENSP00000262178,ENSP00000274625,ENSP00000309968,ENSP00000337133,ENSP00000342070,ENSP00000348918,ENSP00000351015,ENSP00000361405,ENSP00000387662,ENSP00000391826	ADAM17,APOE,CCR7,CTSB,EPO,FGF18,GCG,IGF2,KITLG,MMP9,NF1,SAA1,SERPINA9,VIPR2
GO.0001934	positive regulation of protein phosphorylation	13	8.53e-05	ENSP00000223271,ENSP00000228280,ENSP00000246657,ENSP00000252723,ENSP00000274625,ENSP00000288098,ENSP00000309968,ENSP00000341551,ENSP00000348918,ENSP00000355370,ENSP00000361405,ENSP00000387662,ENSP00000391826	ADAM17,CCR7,CNTF,EPO,FGF18,GCG,IGF2,IL34,KITLG,MMP9,RARRES2,SAA1,SMAD4
GO.0031328	positive regulation of cellular biosynthetic process	13	0.014	ENSP00000228280,ENSP00000246657,ENSP00000252486,ENSP00000252723,ENSP00000262178,ENSP00000265643,ENSP00000341551,ENSP00000351015,ENSP00000355718,ENSP00000387662,ENSP00000391826,ENSP00000408632,ENSP00000441954	APOE,CCR7,CDH13,DLL1,EPO,GAL,GCG,IGF2,KITLG,NF1,SMAD4,SMAD5,VIPR2
GO.0009605	response to external stimulus	13	0.0245	ENSP00000008938,ENSP00000223271,ENSP00000225842,ENSP00000246657,ENSP00000252723,ENSP00000255030,ENSP00000262407,ENSP00000309968,ENSP00000341551,ENSP00000342070,ENSP00000348918,ENSP00000353224,ENSP00000361405	ADAM17,CCL1,CCR7,CRP,CTSB,EPO,ITGA2B,MMP9,PGLYRP1,RARRES2,SAA1,SMAD4,TFRC
GO.0048585	negative regulation of response to stimulus	12	0.00668	ENSP00000008938,ENSP00000156499,ENSP00000252486,ENSP00000252723,ENSP00000256759,ENSP00000263671,ENSP00000309968,ENSP00000323155,ENSP00000334052,ENSP00000348918,ENSP00000361405,ENSP00000387662	ADAM17,APOE,CHRDL2,DAND5,EPO,FST,GCG,KLK14,LGMN,MMP9,PGLYRP1,SAA1
GO.0002682	regulation of immune system process	12	0.0082	ENSP00000223271,ENSP00000246657,ENSP00000262407,ENSP00000265643,ENSP00000274625,ENSP00000288098,ENSP00000309968,ENSP00000334052,ENSP00000342070,ENSP00000351015,ENSP00000355718,ENSP00000391826	ADAM17,CCR7,CTSB,DLL1,FGF18,GAL,IGF2,IL34,ITGA2B,LGMN,NF1,RARRES2
GO.0009719	response to endogenous stimulus	12	0.0102	ENSP00000225842,ENSP00000228280,ENSP00000246657,ENSP00000252723,ENSP00000265643,ENSP00000274625,ENSP00000309968,ENSP00000341551,ENSP00000387662,ENSP00000391826,ENSP00000408632,ENSP00000441954	ADAM17,CCL1,CCR7,CDH13,EPO,FGF18,GAL,GCG,IGF2,KITLG,SMAD4,SMAD5
GO.0042127	regulation of cell proliferation	12	0.014	ENSP00000228280,ENSP00000252486,ENSP00000252723,ENSP00000262178,ENSP00000265643,ENSP00000274625,ENSP00000288098,ENSP00000309968,ENSP00000341551,ENSP00000355370,ENSP00000391826,ENSP00000408632	ADAM17,APOE,CDH13,CNTF,EPO,FGF18,GAL,IGF2,IL34,KITLG,SMAD4,VIPR2
GO.0045595	regulation of cell differentiation	12	0.014	ENSP00000008938,ENSP00000223271,ENSP00000228280,ENSP00000252486,ENSP00000252723,ENSP00000255030,ENSP00000265643,ENSP00000274625,ENSP00000288098,ENSP00000341551,ENSP00000355370,ENSP00000441954	APOE,CNTF,CRP,EPO,FGF18,GAL,IL34,KITLG,PGLYRP1,RARRES2,SMAD4,SMAD5
GO.0045935	positive regulation of nucleobase-containing compound metabolic process	12	0.0304	ENSP00000228280,ENSP00000252486,ENSP00000252723,ENSP00000262178,ENSP00000265643,ENSP00000341551,ENSP00000351015,ENSP00000355718,ENSP00000387662,ENSP00000391826,ENSP00000408632,ENSP00000441954	APOE,CDH13,DLL1,EPO,GAL,GCG,IGF2,KITLG,NF1,SMAD4,SMAD5,VIPR2
GO.0023057	negative regulation of signaling	11	0.00989	ENSP00000156499,ENSP00000252486,ENSP00000252723,ENSP00000256759,ENSP00000263671,ENSP00000293330,ENSP00000309968,ENSP00000323155,ENSP00000334052,ENSP00000361405,ENSP00000387662	ADAM17,APOE,CHRDL2,DAND5,EPO,FST,GCG,HCRT,KLK14,LGMN,MMP9
GO.0010648	negative regulation of cell communication	11	0.0102	ENSP00000156499,ENSP00000252486,ENSP00000252723,ENSP00000256759,ENSP00000263671,ENSP00000293330,ENSP00000309968,ENSP00000323155,ENSP00000334052,ENSP00000361405,ENSP00000387662	ADAM17,APOE,CHRDL2,DAND5,EPO,FST,GCG,HCRT,KLK14,LGMN,MMP9
GO.0006955	immune response	11	0.0197	ENSP00000008938,ENSP00000225842,ENSP00000228280,ENSP00000246657,ENSP00000274625,ENSP00000277480,ENSP00000288098,ENSP00000309968,ENSP00000334052,ENSP00000342070,ENSP00000348918	ADAM17,CCL1,CCR7,CTSB,FGF18,IL34,KITLG,LCN2,LGMN,PGLYRP1,SAA1
GO.1901700	response to oxygen-containing compound	11	0.0204	ENSP00000246657,ENSP00000252486,ENSP00000252723,ENSP00000265643,ENSP00000274625,ENSP00000309968,ENSP00000342070,ENSP00000353224,ENSP00000366641,ENSP00000387662,ENSP00000391826	ADAM17,APOE,CCR7,CTSB,EPO,FGF18,GAL,GCG,IGF2,SLC2A5,TFRC
GO.1902531	regulation of intracellular signal transduction	11	0.0265	ENSP00000228280,ENSP00000246657,ENSP00000252486,ENSP00000252723,ENSP00000274625,ENSP00000348918,ENSP00000355370,ENSP00000361405,ENSP00000387662,ENSP00000391826,ENSP00000408632	APOE,CCR7,CDH13,CNTF,EPO,FGF18,GCG,IGF2,KITLG,MMP9,SAA1
GO.0043085	positive regulation of catalytic activity	11	0.0311	ENSP00000228280,ENSP00000246657,ENSP00000252486,ENSP00000252723,ENSP00000262178,ENSP00000274625,ENSP00000309968,ENSP00000348918,ENSP00000351015,ENSP00000387662,ENSP00000391826	ADAM17,APOE,CCR7,EPO,FGF18,GCG,IGF2,KITLG,NF1,SAA1,VIPR2
GO.0010941	regulation of cell death	11	0.0394	ENSP00000228280,ENSP00000246657,ENSP00000252486,ENSP00000252723,ENSP00000265643,ENSP00000301411,ENSP00000309968,ENSP00000334052,ENSP00000341551,ENSP00000355370,ENSP00000361405	ADAM17,APOE,CCR7,CNTF,EPO,GAL,KITLG,LGMN,MMP9,NTF4,SMAD4
GO.2000026	regulation of multicellular organismal development	11	0.0472	ENSP00000008938,ENSP00000228280,ENSP00000252486,ENSP00000252723,ENSP00000256759,ENSP00000265643,ENSP00000274625,ENSP00000288098,ENSP00000341551,ENSP00000355370,ENSP00000355718	APOE,CNTF,DLL1,EPO,FGF18,FST,GAL,IL34,KITLG,PGLYRP1,SMAD4
GO.0030334	regulation of cell migration	10	0.000711	ENSP00000223271,ENSP00000228280,ENSP00000246657,ENSP00000252486,ENSP00000262407,ENSP00000274625,ENSP00000309968,ENSP00000351015,ENSP00000361405,ENSP00000408632	ADAM17,APOE,CCR7,CDH13,FGF18,ITGA2B,KITLG,MMP9,NF1,RARRES2
GO.0045859	regulation of protein kinase activity	10	0.00135	ENSP00000228280,ENSP00000246657,ENSP00000252486,ENSP00000252723,ENSP00000274625,ENSP00000309968,ENSP00000348918,ENSP00000351015,ENSP00000387662,ENSP00000391826	ADAM17,APOE,CCR7,EPO,FGF18,GCG,IGF2,KITLG,NF1,SAA1
GO.0008284	positive regulation of cell proliferation	10	0.00361	ENSP00000228280,ENSP00000252723,ENSP00000274625,ENSP00000288098,ENSP00000309968,ENSP00000341551,ENSP00000351015,ENSP00000355370,ENSP00000391826,ENSP00000408632	ADAM17,CDH13,CNTF,EPO,FGF18,IGF2,IL34,KITLG,NF1,SMAD4
GO.0002684	positive regulation of immune system process	10	0.00422	ENSP00000008938,ENSP00000223271,ENSP00000228280,ENSP00000246657,ENSP00000262407,ENSP00000288098,ENSP00000309968,ENSP00000334052,ENSP00000342070,ENSP00000391826	ADAM17,CCR7,CTSB,IGF2,IL34,ITGA2B,KITLG,LGMN,PGLYRP1,RARRES2
GO.0060548	negative regulation of cell death	10	0.00762	ENSP00000228280,ENSP00000246657,ENSP00000252486,ENSP00000252723,ENSP00000301411,ENSP00000334052,ENSP00000341551,ENSP00000342070,ENSP00000355370,ENSP00000361405	APOE,CCR7,CNTF,CTSB,EPO,KITLG,LGMN,MMP9,NTF4,SMAD4
GO.0009968	negative regulation of signal transduction	10	0.0167	ENSP00000156499,ENSP00000252486,ENSP00000252723,ENSP00000256759,ENSP00000263671,ENSP00000309968,ENSP00000323155,ENSP00000334052,ENSP00000361405,ENSP00000387662	ADAM17,APOE,CHRDL2,DAND5,EPO,FST,GCG,KLK14,LGMN,MMP9
GO.0051094	positive regulation of developmental process	10	0.0216	ENSP00000223271,ENSP00000228280,ENSP00000252486,ENSP00000252723,ENSP00000256759,ENSP00000265643,ENSP00000274625,ENSP00000288098,ENSP00000341551,ENSP00000441954	APOE,EPO,FGF18,FST,GAL,IL34,KITLG,RARRES2,SMAD4,SMAD5
GO.0040011	locomotion	10	0.0316	ENSP00000223271,ENSP00000225842,ENSP00000228280,ENSP00000246657,ENSP00000262407,ENSP00000309124,ENSP00000309968,ENSP00000341551,ENSP00000348918,ENSP00000408632	ADAM17,CCL1,CCR7,CDH13,ITGA2B,KITLG,OLR1,RARRES2,SAA1,SMAD4
GO.0030097	hemopoiesis	9	0.00115	ENSP00000228280,ENSP00000246657,ENSP00000252723,ENSP00000256759,ENSP00000309968,ENSP00000353224,ENSP00000355718,ENSP00000361405,ENSP00000441954	ADAM17,CCR7,DLL1,EPO,FST,KITLG,MMP9,SMAD5,TFRC
GO.0002520	immune system development	9	0.00243	ENSP00000228280,ENSP00000246657,ENSP00000252723,ENSP00000256759,ENSP00000309968,ENSP00000353224,ENSP00000355718,ENSP00000361405,ENSP00000441954	ADAM17,CCR7,DLL1,EPO,FST,KITLG,MMP9,SMAD5,TFRC
GO.1902533	positive regulation of intracellular signal transduction	9	0.0146	ENSP00000228280,ENSP00000246657,ENSP00000252723,ENSP00000274625,ENSP00000348918,ENSP00000355370,ENSP00000387662,ENSP00000391826,ENSP00000408632	CCR7,CDH13,CNTF,EPO,FGF18,GCG,IGF2,KITLG,SAA1
GO.0032101	regulation of response to external stimulus	9	0.0198	ENSP00000008938,ENSP00000223271,ENSP00000246657,ENSP00000252486,ENSP00000274625,ENSP00000309968,ENSP00000348918,ENSP00000387662,ENSP00000408632	ADAM17,APOE,CCR7,CDH13,FGF18,GCG,PGLYRP1,RARRES2,SAA1
GO.0071495	cellular response to endogenous stimulus	9	0.0426	ENSP00000228280,ENSP00000274625,ENSP00000309968,ENSP00000341551,ENSP00000342070,ENSP00000387662,ENSP00000391826,ENSP00000408632,ENSP00000441954	ADAM17,CDH13,CTSB,FGF18,GCG,IGF2,KITLG,SMAD4,SMAD5
GO.0030335	positive regulation of cell migration	8	0.000767	ENSP00000223271,ENSP00000228280,ENSP00000246657,ENSP00000262407,ENSP00000274625,ENSP00000309968,ENSP00000361405,ENSP00000408632	ADAM17,CCR7,CDH13,FGF18,ITGA2B,KITLG,MMP9,RARRES2
GO.0006954	inflammatory response	8	0.00208	ENSP00000223271,ENSP00000246657,ENSP00000255030,ENSP00000265643,ENSP00000288098,ENSP00000309124,ENSP00000348918,ENSP00000353224	CCR7,CRP,GAL,IL34,OLR1,RARRES2,SAA1,TFRC
GO.0045860	positive regulation of protein kinase activity	8	0.00231	ENSP00000228280,ENSP00000246657,ENSP00000252723,ENSP00000274625,ENSP00000309968,ENSP00000348918,ENSP00000387662,ENSP00000391826	ADAM17,CCR7,EPO,FGF18,GCG,IGF2,KITLG,SAA1
GO.0043408	regulation of MAPK cascade	8	0.0118	ENSP00000228280,ENSP00000246657,ENSP00000252486,ENSP00000274625,ENSP00000348918,ENSP00000351015,ENSP00000387662,ENSP00000391826	APOE,CCR7,FGF18,GCG,IGF2,KITLG,NF1,SAA1
GO.0016477	cell migration	8	0.0316	ENSP00000225842,ENSP00000228280,ENSP00000246657,ENSP00000309124,ENSP00000309968,ENSP00000348918,ENSP00000361405,ENSP00000408632	ADAM17,CCL1,CCR7,CDH13,KITLG,MMP9,OLR1,SAA1
GO.0009611	response to wounding	8	0.033	ENSP00000220478,ENSP00000252723,ENSP00000309124,ENSP00000309968,ENSP00000342070,ENSP00000348918,ENSP00000351015,ENSP00000391826	ADAM17,CTSB,EPO,IGF2,NF1,OLR1,SAA1,SCG3
GO.0045597	positive regulation of cell differentiation	8	0.0426	ENSP00000223271,ENSP00000228280,ENSP00000252486,ENSP00000252723,ENSP00000274625,ENSP00000288098,ENSP00000341551,ENSP00000441954	APOE,EPO,FGF18,IL34,KITLG,RARRES2,SMAD4,SMAD5
GO.0051674	localization of cell	8	0.047	ENSP00000225842,ENSP00000228280,ENSP00000246657,ENSP00000309124,ENSP00000309968,ENSP00000348918,ENSP00000361405,ENSP00000408632	ADAM17,CCL1,CCR7,CDH13,KITLG,MMP9,OLR1,SAA1
GO.0032844	regulation of homeostatic process	7	0.0052	ENSP00000228280,ENSP00000246657,ENSP00000252723,ENSP00000309968,ENSP00000351015,ENSP00000353224,ENSP00000387662	ADAM17,CCR7,EPO,GCG,KITLG,NF1,TFRC
GO.0006875	cellular metal ion homeostasis	7	0.00739	ENSP00000225842,ENSP00000246657,ENSP00000252486,ENSP00000277480,ENSP00000293330,ENSP00000348918,ENSP00000353224	APOE,CCL1,CCR7,HCRT,LCN2,SAA1,TFRC
GO.0071900	regulation of protein serine/threonine kinase activity	7	0.011	ENSP00000228280,ENSP00000252486,ENSP00000274625,ENSP00000309968,ENSP00000348918,ENSP00000351015,ENSP00000391826	ADAM17,APOE,FGF18,IGF2,KITLG,NF1,SAA1
GO.0001817	regulation of cytokine production	7	0.023	ENSP00000008938,ENSP00000246657,ENSP00000255030,ENSP00000309968,ENSP00000341551,ENSP00000348918,ENSP00000355718	ADAM17,CCR7,CRP,DLL1,PGLYRP1,SAA1,SMAD4
GO.1903530	regulation of secretion by cell	7	0.0426	ENSP00000246657,ENSP00000255030,ENSP00000265643,ENSP00000293330,ENSP00000348918,ENSP00000351015,ENSP00000387662	CCR7,CRP,GAL,GCG,HCRT,NF1,SAA1
GO.0001503	ossification	6	0.00658	ENSP00000263671,ENSP00000274625,ENSP00000351015,ENSP00000361405,ENSP00000391826,ENSP00000441954	CHRDL2,FGF18,IGF2,MMP9,NF1,SMAD5
GO.0043410	positive regulation of MAPK cascade	6	0.0422	ENSP00000228280,ENSP00000246657,ENSP00000274625,ENSP00000348918,ENSP00000387662,ENSP00000391826	CCR7,FGF18,GCG,IGF2,KITLG,SAA1
GO.0007389	pattern specification process	6	0.0426	ENSP00000301411,ENSP00000323155,ENSP00000341551,ENSP00000349490,ENSP00000355718,ENSP00000441954	DAND5,DLL1,MFNG,NTF4,SMAD4,SMAD5
GO.0043434	response to peptide hormone	6	0.0426	ENSP00000265643,ENSP00000274625,ENSP00000309968,ENSP00000342070,ENSP00000387662,ENSP00000391826	ADAM17,CTSB,FGF18,GAL,GCG,IGF2
GO.0002687	positive regulation of leukocyte migration	5	0.00164	ENSP00000223271,ENSP00000228280,ENSP00000246657,ENSP00000262407,ENSP00000309968	ADAM17,CCR7,ITGA2B,KITLG,RARRES2
GO.0050921	positive regulation of chemotaxis	5	0.00232	ENSP00000223271,ENSP00000246657,ENSP00000274625,ENSP00000309968,ENSP00000408632	ADAM17,CCR7,CDH13,FGF18,RARRES2
GO.0050731	positive regulation of peptidyl-tyrosine phosphorylation	5	0.0079	ENSP00000228280,ENSP00000252723,ENSP00000309968,ENSP00000355370,ENSP00000391826	ADAM17,CNTF,EPO,IGF2,KITLG
GO.0030099	myeloid cell differentiation	5	0.016	ENSP00000246657,ENSP00000252723,ENSP00000353224,ENSP00000361405,ENSP00000441954	CCR7,EPO,MMP9,SMAD5,TFRC
GO.0090092	regulation of transmembrane receptor protein serine/threonine kinase signaling pathway	5	0.0196	ENSP00000256759,ENSP00000263671,ENSP00000309968,ENSP00000323155,ENSP00000341551	ADAM17,CHRDL2,DAND5,FST,SMAD4
GO.0044706	multi-multicellular organism process	5	0.022	ENSP00000156499,ENSP00000252723,ENSP00000330658,ENSP00000342070,ENSP00000361405	CTSB,EPO,KLK14,MMP9,PAPPA
GO.0001666	response to hypoxia	5	0.0423	ENSP00000252723,ENSP00000309968,ENSP00000341551,ENSP00000351015,ENSP00000353224	ADAM17,EPO,NF1,SMAD4,TFRC
GO.0071902	positive regulation of protein serine/threonine kinase activity	5	0.0426	ENSP00000228280,ENSP00000274625,ENSP00000309968,ENSP00000348918,ENSP00000391826	ADAM17,FGF18,IGF2,KITLG,SAA1
GO.0043405	regulation of MAP kinase activity	5	0.0453	ENSP00000228280,ENSP00000252486,ENSP00000274625,ENSP00000348918,ENSP00000351015	APOE,FGF18,KITLG,NF1,SAA1
GO.0006874	cellular calcium ion homeostasis	5	0.047	ENSP00000225842,ENSP00000246657,ENSP00000252486,ENSP00000293330,ENSP00000348918	APOE,CCL1,CCR7,HCRT,SAA1
GO.0045682	regulation of epidermis development	4	0.00378	ENSP00000256759,ENSP00000265643,ENSP00000341551,ENSP00000355718	DLL1,FST,GAL,SMAD4
GO.1901184	regulation of ERBB signaling pathway	4	0.00793	ENSP00000309968,ENSP00000334052,ENSP00000361405,ENSP00000408632	ADAM17,CDH13,LGMN,MMP9
GO.0030804	positive regulation of cyclic nucleotide biosynthetic process	4	0.014	ENSP00000252486,ENSP00000262178,ENSP00000351015,ENSP00000387662	APOE,GCG,NF1,VIPR2
GO.1900373	positive regulation of purine nucleotide biosynthetic process	4	0.0154	ENSP00000252486,ENSP00000262178,ENSP00000351015,ENSP00000387662	APOE,GCG,NF1,VIPR2
GO.0090101	negative regulation of transmembrane receptor protein serine/threonine kinase signaling pathway	4	0.0197	ENSP00000256759,ENSP00000263671,ENSP00000309968,ENSP00000323155	ADAM17,CHRDL2,DAND5,FST
GO.0043271	negative regulation of ion transport	4	0.0235	ENSP00000252486,ENSP00000252723,ENSP00000293330,ENSP00000361405	APOE,EPO,HCRT,MMP9
GO.0010632	regulation of epithelial cell migration	4	0.0426	ENSP00000252486,ENSP00000274625,ENSP00000351015,ENSP00000361405	APOE,FGF18,MMP9,NF1
GO.0051797	regulation of hair follicle development	3	0.00162	ENSP00000256759,ENSP00000265643,ENSP00000341551	FST,GAL,SMAD4
GO.0033032	regulation of myeloid cell apoptotic process	3	0.00593	ENSP00000228280,ENSP00000252723,ENSP00000309968	ADAM17,EPO,KITLG
GO.0006953	acute-phase response	3	0.0197	ENSP00000255030,ENSP00000348918,ENSP00000353224	CRP,SAA1,TFRC
GO.0050830	defense response to Gram-positive bacterium	3	0.0318	ENSP00000008938,ENSP00000255030,ENSP00000309968	ADAM17,CRP,PGLYRP1
GO.0009880	embryonic pattern specification	3	0.0426	ENSP00000341551,ENSP00000355718,ENSP00000441954	DLL1,SMAD4,SMAD5
GO.0032092	positive regulation of protein binding	3	0.0455	ENSP00000349490,ENSP00000361405,ENSP00000387662	GCG,MFNG,MMP9
GO.0033025	regulation of mast cell apoptotic process	2	0.00773	ENSP00000228280,ENSP00000309968	ADAM17,KITLG
GO.0010737	protein kinase A signaling	2	0.0105	ENSP00000265643,ENSP00000387662	GAL,GCG
GO.0048859	formation of anatomical boundary	2	0.014	ENSP00000301411,ENSP00000341551	NTF4,SMAD4
GO.0051798	positive regulation of hair follicle development	2	0.0247	ENSP00000256759,ENSP00000265643	FST,GAL
GO.0032926	negative regulation of activin receptor signaling pathway	2	0.0292	ENSP00000256759,ENSP00000323155	DAND5,FST
GO.0033033	negative regulation of myeloid cell apoptotic process	2	0.0426	ENSP00000228280,ENSP00000252723	EPO,KITLG
GO.0055094	response to lipoprotein particle	2	0.0426	ENSP00000309968,ENSP00000408632	ADAM17,CDH13

## Sheet: CC
CC: cellular component
#pathway ID	pathway description	observed gene count	false discovery rate	matching proteins in your network (IDs)	matching proteins in your network (labels)
GO.0005576	extracellular region	37	7.24e-13	ENSP00000008938,ENSP00000156499,ENSP00000220478,ENSP00000221204,ENSP00000223271,ENSP00000225842,ENSP00000252486,ENSP00000252723,ENSP00000255030,ENSP00000256759,ENSP00000262407,ENSP00000263671,ENSP00000264896,ENSP00000265643,ENSP00000274625,ENSP00000277480,ENSP00000288098,ENSP00000293330,ENSP00000301411,ENSP00000309124,ENSP00000309542,ENSP00000323155,ENSP00000330658,ENSP00000331358,ENSP00000334052…	APOE,CCL1,CDH13,CHRDL2,CNTF,CRP,CTSB,DAND5,DLL1,EPO,FGF18,FGL1,FST,GAL,GAST,GCG,HCRT,IL31,IL34,ITGA2B,KLK14,LCN2,LGMN,MFNG,MMP9,NTF4,OLR1,PAPPA,PGA5,PGLYRP1,RARRES2,SAA1,SCARB2,SCG3,SERPINA9,SLC2A5,TFRC
GO.0044421	extracellular region part	30	9.9e-09	ENSP00000008938,ENSP00000156499,ENSP00000221204,ENSP00000223271,ENSP00000225842,ENSP00000228280,ENSP00000252486,ENSP00000252723,ENSP00000255030,ENSP00000262407,ENSP00000263671,ENSP00000264896,ENSP00000265643,ENSP00000274625,ENSP00000277480,ENSP00000288098,ENSP00000309124,ENSP00000309542,ENSP00000334052,ENSP00000337133,ENSP00000342070,ENSP00000348918,ENSP00000349490,ENSP00000353224,ENSP00000355370…	APOE,CCL1,CDH13,CHRDL2,CNTF,CRP,CTSB,EPO,FGF18,FGL1,GAL,GCG,IL31,IL34,ITGA2B,KITLG,KLK14,LCN2,LGMN,MFNG,MMP9,OLR1,PGA5,PGLYRP1,RARRES2,SAA1,SCARB2,SERPINA9,SLC2A5,TFRC
GO.0005615	extracellular space	24	1.6e-13	ENSP00000156499,ENSP00000221204,ENSP00000225842,ENSP00000228280,ENSP00000252486,ENSP00000252723,ENSP00000255030,ENSP00000262407,ENSP00000263671,ENSP00000265643,ENSP00000274625,ENSP00000277480,ENSP00000288098,ENSP00000337133,ENSP00000342070,ENSP00000348918,ENSP00000349490,ENSP00000353224,ENSP00000355370,ENSP00000361405,ENSP00000366234,ENSP00000387662,ENSP00000391826,ENSP00000408632	APOE,CCL1,CDH13,CHRDL2,CNTF,CRP,CTSB,EPO,FGF18,FGL1,GAL,GCG,IGF2,IL31,IL34,ITGA2B,KITLG,KLK14,LCN2,MFNG,MMP9,SAA1,SERPINA9,TFRC
GO.0031982	vesicle	23	0.000544	ENSP00000008938,ENSP00000156499,ENSP00000220478,ENSP00000221204,ENSP00000223271,ENSP00000252486,ENSP00000255030,ENSP00000262407,ENSP00000264896,ENSP00000265643,ENSP00000277480,ENSP00000309124,ENSP00000309542,ENSP00000334052,ENSP00000342070,ENSP00000348918,ENSP00000353224,ENSP00000355718,ENSP00000361405,ENSP00000366641,ENSP00000387662,ENSP00000391826,ENSP00000408632	APOE,CDH13,CRP,CTSB,DLL1,FGL1,GAL,GCG,IGF2,ITGA2B,KLK14,LCN2,LGMN,MMP9,OLR1,PGA5,PGLYRP1,RARRES2,SAA1,SCARB2,SCG3,SLC2A5,TFRC
GO.0031988	membrane-bounded vesicle	22	0.000781	ENSP00000008938,ENSP00000156499,ENSP00000220478,ENSP00000221204,ENSP00000223271,ENSP00000252486,ENSP00000255030,ENSP00000262407,ENSP00000264896,ENSP00000265643,ENSP00000277480,ENSP00000309124,ENSP00000309542,ENSP00000334052,ENSP00000342070,ENSP00000348918,ENSP00000353224,ENSP00000361405,ENSP00000366641,ENSP00000387662,ENSP00000391826,ENSP00000408632	APOE,CDH13,CRP,CTSB,FGL1,GAL,GCG,IGF2,ITGA2B,KLK14,LCN2,LGMN,MMP9,OLR1,PGA5,PGLYRP1,RARRES2,SAA1,SCARB2,SCG3,SLC2A5,TFRC
GO.0070062	extracellular exosome	19	0.00142	ENSP00000008938,ENSP00000156499,ENSP00000221204,ENSP00000223271,ENSP00000252486,ENSP00000255030,ENSP00000262407,ENSP00000264896,ENSP00000277480,ENSP00000309124,ENSP00000309542,ENSP00000334052,ENSP00000342070,ENSP00000348918,ENSP00000353224,ENSP00000361405,ENSP00000366641,ENSP00000391826,ENSP00000408632	APOE,CDH13,CRP,CTSB,FGL1,IGF2,ITGA2B,KLK14,LCN2,LGMN,MMP9,OLR1,PGA5,PGLYRP1,RARRES2,SAA1,SCARB2,SLC2A5,TFRC
GO.0031410	cytoplasmic vesicle	10	0.0251	ENSP00000220478,ENSP00000252486,ENSP00000262407,ENSP00000265643,ENSP00000342070,ENSP00000348918,ENSP00000353224,ENSP00000355718,ENSP00000387662,ENSP00000391826	APOE,CTSB,DLL1,GAL,GCG,IGF2,ITGA2B,SAA1,SCG3,TFRC
GO.0030141	secretory granule	6	0.0109	ENSP00000220478,ENSP00000262407,ENSP00000265643,ENSP00000293330,ENSP00000387662,ENSP00000391826	GAL,GCG,HCRT,IGF2,ITGA2B,SCG3
GO.0098552	side of membrane	6	0.0405	ENSP00000246657,ENSP00000262407,ENSP00000342070,ENSP00000351015,ENSP00000353224,ENSP00000408632	CCR7,CDH13,CTSB,ITGA2B,NF1,TFRC
GO.0060205	cytoplasmic membrane-bounded vesicle lumen	5	0.000571	ENSP00000220478,ENSP00000252486,ENSP00000348918,ENSP00000387662,ENSP00000391826	APOE,GCG,IGF2,SAA1,SCG3
GO.0009897	external side of plasma membrane	5	0.0251	ENSP00000246657,ENSP00000262407,ENSP00000342070,ENSP00000353224,ENSP00000408632	CCR7,CDH13,CTSB,ITGA2B,TFRC

## Sheet: MF
MF: molecular function
#pathway ID	pathway description	observed gene count	false discovery rate	matching proteins in your network (IDs)	matching proteins in your network (labels)
GO.0005515	protein binding	27	0.000938	ENSP00000004982,ENSP00000223271,ENSP00000225842,ENSP00000228280,ENSP00000246657,ENSP00000252486,ENSP00000255030,ENSP00000256759,ENSP00000262407,ENSP00000264896,ENSP00000265643,ENSP00000274625,ENSP00000288098,ENSP00000301411,ENSP00000309968,ENSP00000331358,ENSP00000341551,ENSP00000342070,ENSP00000348918,ENSP00000353224,ENSP00000355370,ENSP00000355718,ENSP00000361405,ENSP00000387662,ENSP00000391826…	ADAM17,APOE,CCL1,CCR7,CDH13,CNTF,CRP,CTSB,DLL1,FGF18,FST,GAL,GAST,GCG,HSPB6,IGF2,IL34,ITGA2B,KITLG,MMP9,NTF4,RARRES2,SAA1,SCARB2,SMAD4,SMAD5,TFRC
GO.0005102	receptor binding	16	9.48e-06	ENSP00000223271,ENSP00000225842,ENSP00000228280,ENSP00000252486,ENSP00000255030,ENSP00000265643,ENSP00000274625,ENSP00000288098,ENSP00000301411,ENSP00000309968,ENSP00000331358,ENSP00000348918,ENSP00000355370,ENSP00000355718,ENSP00000387662,ENSP00000391826	ADAM17,APOE,CCL1,CNTF,CRP,DLL1,FGF18,GAL,GAST,GCG,IGF2,IL34,KITLG,NTF4,RARRES2,SAA1
GO.0004175	endopeptidase activity	7	0.0356	ENSP00000156499,ENSP00000309542,ENSP00000309968,ENSP00000330658,ENSP00000334052,ENSP00000342070,ENSP00000361405	ADAM17,CTSB,KLK14,LGMN,MMP9,PAPPA,PGA5
GO.0008083	growth factor activity	4	0.027	ENSP00000274625,ENSP00000301411,ENSP00000355370,ENSP00000391826	CNTF,FGF18,IGF2,NTF4
GO.0071813	lipoprotein particle binding	3	0.027	ENSP00000252486,ENSP00000255030,ENSP00000408632	APOE,CDH13,CRP
GO.0005138	interleukin-6 receptor binding	2	0.0356	ENSP00000309968,ENSP00000355370	ADAM17,CNTF

## Sheet: KEGG Pathway
#pathway ID	pathway description	observed gene count	false discovery rate	matching proteins in your network (IDs)	matching proteins in your network (labels)
5200	Pathways in cancer	6	0.02	ENSP00000228280,ENSP00000262407,ENSP00000274625,ENSP00000341551,ENSP00000361405,ENSP00000399324	FGF16,FGF18,ITGA2B,KITLG,MMP9,SMAD4
4060	Cytokine-cytokine receptor interaction	5	0.0334	ENSP00000225842,ENSP00000228280,ENSP00000246657,ENSP00000252723,ENSP00000355370	CCL1,CCR7,CNTF,EPO,KITLG
4640	Hematopoietic cell lineage	4	0.0172	ENSP00000228280,ENSP00000252723,ENSP00000262407,ENSP00000353224	EPO,ITGA2B,KITLG,TFRC
4330	Notch signaling pathway	3	0.021	ENSP00000309968,ENSP00000349490,ENSP00000355718	ADAM17,DLL1,MFNG
